# Supplementary material
Source: bioRxiv or medRxiv preprint supplement (https://www.medrxiv.org/highwire/filestream/85376/field_highwire_adjunct_files/0/2020.04.10.20060632-1.pdf)
Supplement: Supplementary file [file 2020.04.10.20060632-1.pdf]

## Filtration efficiency test

|                                       |                   |                           | 0,3µm                     | 0,5µm  | 3,0µm   |        |
|---------------------------------------|-------------------|---------------------------|---------------------------|--------|---------|--------|
| Unsterilised material (from package)  | White layer only  | Sample 1 (n = 4)          | 3/4/2020                  | 60.84% | 78.59%  | 95.90% |
|                                       |                   | Sample 2 (n = 4)          | 3/4/2020                  | 64.29% | 82.02%  | 96.45% |
|                                       |                   |                           | Averaged                  | 62.57% | 80.30%  | 96.17% |
|                                       |                   |                           | Intersample Standard Dev. | 2.44%  | 2.43%   | 0.39%  |
|                                       | Blue layer only   | Sample 3 (n = 4)          | 3/4/2020                  | 62.28% | 78.95%  | 96.16% |
|                                       |                   | Sample 4 (n = 4)          | 3/4/2020                  | 63.40% | 80.09%  | 96.72% |
|                                       |                   |                           | Averaged                  | 62.84% | 79.52%  | 96.44% |
|                                       |                   |                           | Intersample Standard Dev. | 0.79%  | 0.81%   | 0.39%  |
|                                       | Single Layer      | Sample 5(n = 4)           | 3/4/2020                  | 70.42% | 90.17%  | 99.65% |
|                                       |                   | Sample 6 (n = 4)          | 3/4/2020                  | 69.74% | 89.19%  | 99.84% |
|                                       |                   |                           | Averaged                  | 70.08% | 89.68%  | 99.74% |
|                                       |                   |                           | Intersample Standard Dev. | 0.48%  | 0.70%   | 0.13%  |
|                                       | Double Layer      | Sample 7 (n = 4)          | 3/4/2020                  | 87.99% | 98.35%  | 99.98% |
|                                       |                   | Sample 8 (n = 4)          | 3/4/2020                  | 87.38% | 98.21%  | 99.98% |
|                                       |                   |                           | Averaged                  | 87.68% | 98.28%  | 99.98% |
|                                       |                   |                           | Intersample Standard Dev. | 0.43%  | 0.10%   | 0.00%  |
| Double Layer, reversed                | Sample 9 (n = 4)  | 3/4/2020                  | 89.29%                    | 98.50% | 99.98%  |        |
|                                       | Sample 10 (n = 4) | 3/4/2020                  | 88.27%                    | 98.20% | 100.00% |        |
|                                       |                   | Averaged                  | 88.78%                    | 98.35% | 99.99%  |        |
|                                       |                   | Intersample Standard Dev. | 0.72%                     | 0.22%  | 0.01%   |        |
| Double Layer, after use<br>20 minutes | Sample 11 (n = 4) | 3/4/2020                  | 90.97%                    | 99.08% | 100.00% |        |
|                                       | Sample 12 (n = 4) | 3/4/2020                  | 90.90%                    | 99.07% | 100.00% |        |
|                                       |                   | Averaged                  | 90.93%                    | 99.07% | 100.00% |        |

**Steam Sterilised (5min, 134 degrees Celsius, 2 atm)**

|                             |                   |           |                                  |               |               |               |
|-----------------------------|-------------------|-----------|----------------------------------|---------------|---------------|---------------|
|                             |                   |           | <b>Intersample Standard Dev.</b> | <b>0.05%</b>  | <b>0.00%</b>  | <b>0.00%</b>  |
| Triple layer                | Sample 13 (n = 4) | 3/4/2020  | 94.10%                           | 99.51%        | 99.98%        |               |
|                             | Sample 14 (n = 4) | 3/4/2020  | 93.58%                           | 99.39%        | 100.00%       |               |
|                             |                   |           | <b>Averaged</b>                  | <b>93.84%</b> | <b>99.45%</b> | <b>99.99%</b> |
|                             |                   |           | <b>Intersample Standard Dev.</b> | <b>0.37%</b>  | <b>0.08%</b>  | <b>0.01%</b>  |
| Single Layer, 1x sterilized | Sample 15 (n = 4) | 3/4/2020  | 66.15%                           | 87.14%        | 99.40%        |               |
|                             | Sample 16 (n = 4) | 3/4/2020  | 66.58%                           | 87.24%        | 99.73%        |               |
|                             |                   |           | <b>Averaged</b>                  | <b>66.37%</b> | <b>87.19%</b> | <b>99.57%</b> |
|                             |                   |           | <b>Intersample Standard Dev.</b> | <b>0.31%</b>  | <b>0.07%</b>  | <b>0.23%</b>  |
| Double Layer, 1x sterilized | Sample 17 (n = 4) | 3/4/2020  | 80.63%                           | 95.91%        | 100.00%       |               |
|                             | Sample 18 (n = 4) | 3/4/2020  | 80.16%                           | 95.67%        | 99.98%        |               |
|                             |                   |           | <b>Averaged</b>                  | <b>80.39%</b> | <b>95.79%</b> | <b>99.99%</b> |
|                             |                   |           | <b>Intersample Standard Dev.</b> | <b>0.33%</b>  | <b>0.17%</b>  | <b>0.01%</b>  |
| Triple layer, 1x sterilized | Sample 19 (n = 4) | 3/4/2020  | 87.98%                           | 98.35%        | 99.96%        |               |
|                             | Sample 20 (n = 4) | 3/4/2020  | 88.57%                           | 98.52%        | 99.98%        |               |
|                             | Sample 21 (n = 4) | 12/5/2020 | 82.74%                           | 98.94%        | 99.91%        |               |
|                             | Sample 22 (n = 4) | 12/5/2020 | 83.71%                           | 99.02%        | 99.97%        |               |
|                             | Sample 23 (n = 4) | 12/5/2020 | 83.77%                           | 98.98%        | 99.99%        |               |
|                             | Sample 24 (n = 4) | 12/5/2020 | 83.91%                           | 98.95%        | 99.97%        |               |
|                             |                   |           | <b>Averaged</b>                  | <b>85.11%</b> | <b>98.44%</b> | <b>99.97%</b> |
|                             |                   |           | <b>Intersample Standard Dev.</b> | <b>2.49%</b>  | <b>0.28%</b>  | <b>0.03%</b>  |
| Triple layer, 2x sterilized | Sample 25 (n = 4) | 12/5/2020 | 89.08%                           | 99.52%        | 99.97%        |               |
|                             | Sample 26 (n = 4) | 12/5/2020 | 86.52%                           | 99.26%        | 99.93%        |               |
|                             | Sample 27 (n = 4) | 12/5/2020 | 87.97%                           | 99.42%        | 99.97%        |               |
|                             | Sample 28 (n = 4) | 12/5/2020 | 86.51%                           | 99.31%        | 99.96%        |               |
|                             |                   |           | <b>Averaged</b>                  | <b>87.52%</b> | <b>99.38%</b> | <b>99.96%</b> |
|                             |                   |           | <b>Intersample Standard Dev.</b> | <b>1.25%</b>  | <b>0.12%</b>  | <b>0.02%</b>  |

|                                                           |                                  |                   |           |               |               |               |
|-----------------------------------------------------------|----------------------------------|-------------------|-----------|---------------|---------------|---------------|
|                                                           | Triple layer, 3x sterilized      | Sample 29 (n = 4) | 12/5/2020 | 81.71%        | 98.74%        | 99.97%        |
|                                                           |                                  | Sample 30 (n = 4) | 12/5/2020 | 82.88%        | 98.94%        | 99.92%        |
|                                                           |                                  | Sample 31 (n = 4) | 12/5/2020 | 83.66%        | 99.01%        | 99.97%        |
|                                                           |                                  | Sample 32 (n = 4) | 12/5/2020 | 82.07%        | 98.80%        | 99.99%        |
|                                                           | <b>Averaged</b>                  |                   |           | <b>82.58%</b> | <b>98.87%</b> | <b>99.97%</b> |
|                                                           | <b>Intersample Standard Dev.</b> |                   |           | <b>0.87%</b>  | <b>0.12%</b>  | <b>0.03%</b>  |
|                                                           | Triple layer, 4x sterilized      | Sample 33 (n = 4) | 12/5/2020 | 86.00%        | 99.27%        | 99.96%        |
|                                                           |                                  | Sample 34 (n = 4) | 12/5/2020 | 86.36%        | 99.29%        | 99.90%        |
|                                                           |                                  | Sample 35 (n = 4) | 12/5/2020 | 85.60%        | 99.21%        | 99.97%        |
|                                                           |                                  | Sample 36 (n = 4) | 12/5/2020 | 85.27%        | 99.17%        | 99.92%        |
|                                                           | <b>Averaged</b>                  |                   |           | <b>85.81%</b> | <b>99.23%</b> | <b>99.94%</b> |
|                                                           | <b>Intersample Standard Dev.</b> |                   |           | <b>0.47%</b>  | <b>0.05%</b>  | <b>0.03%</b>  |
|                                                           | Triple layer, 5x sterilized      | Sample 37 (n = 4) | 12/5/2020 | 83.61%        | 99.00%        | 99.95%        |
|                                                           |                                  | Sample 38 (n = 4) | 12/5/2020 | 84.71%        | 99.16%        | 99.98%        |
|                                                           |                                  | Sample 39 (n = 4) | 12/5/2020 | 83.19%        | 98.98%        | 99.96%        |
|                                                           |                                  | Sample 40 (n = 4) | 12/5/2020 | 82.42%        | 98.88%        | 99.99%        |
|                                                           | <b>Averaged</b>                  |                   |           | <b>83.48%</b> | <b>99.00%</b> | <b>99.97%</b> |
|                                                           | <b>Intersample Standard Dev.</b> |                   |           | <b>0.96%</b>  | <b>0.11%</b>  | <b>0.02%</b>  |
| <b>Comparison with commercial Masks &amp; Respirators</b> | Surgical Mask                    | Sample 41         | 12/5/2020 | 55.89%        | 89.26%        | 98.96%        |
|                                                           |                                  | Sample 42         | 12/5/2020 | 51.48%        | 87.47%        | 98.01%        |
|                                                           |                                  | Sample 43         | 12/5/2020 | 57.64%        | 89.86%        | 99.48%        |
|                                                           |                                  | Sample 44         | 12/5/2020 | 53.07%        | 87.84%        | 99.22%        |
|                                                           | <b>Averaged</b>                  |                   |           | <b>54.52%</b> | <b>88.61%</b> | <b>98.92%</b> |
|                                                           | <b>Intersample Standard Dev.</b> |                   |           | <b>2.77%</b>  | <b>1.13%</b>  | <b>0.64%</b>  |
|                                                           | Disposable Face Mask FFP2        | Sample 45         | 12/5/2020 | 93.55%        | 99.52%        | 100.00%       |
|                                                           |                                  | Sample 46         | 12/5/2020 | 93.93%        | 99.58%        | 100.00%       |
|                                                           |                                  | Sample 47         | 12/5/2020 | 94.35%        | 99.61%        | 100.00%       |
|                                                           |                                  | Sample 48         | 12/5/2020 | 94.47%        | 99.57%        | 100.00%       |

|                        |           |           |                                  |               |               |                |
|------------------------|-----------|-----------|----------------------------------|---------------|---------------|----------------|
|                        |           |           | <b>Averaged</b>                  | <b>94.08%</b> | <b>99.57%</b> | <b>100.00%</b> |
|                        |           |           | <b>Intersample Standard Dev.</b> | <b>0.42%</b>  | <b>0.04%</b>  | <b>0.00%</b>   |
| 3M 8320 FFP2 NR D Mask | Sample 49 | 12/5/2020 | 98.91%                           | 99.90%        | 99.91%        |                |
|                        | Sample 50 | 12/5/2020 | 95.91%                           | 99.65%        | 100.00%       |                |
|                        | Sample 51 | 12/5/2020 | 98.10%                           | 99.78%        | 100.00%       |                |
|                        | Sample 52 | 12/5/2020 | 96.84%                           | 99.65%        | 99.83%        |                |
|                        |           |           | <b>Averaged</b>                  | <b>97.44%</b> | <b>99.75%</b> | <b>99.94%</b>  |
|                        |           |           | <b>Intersample Standard Dev.</b> | <b>1.33%</b>  | <b>0.12%</b>  | <b>0.08%</b>   |
